# Supplementary material for: KSHV LANA upregulates the expression of epidermal growth factor like domain 7 to promote angiogenesis
Source: PubMed Central journal article supplement (PMC5787431; doi:10.18632/oncotarget.23456), 2017-12-19
Supplement: oncotarget-09-1210-s001.pdf [file oncotarget-09-1210-s001.pdf]

## **KSHV LANA upregulates the expression of epidermal growth factor like domain 7 to promote angiogenesis**

### **SUPPLEMENTARY MATERIALS**

**Supplementary Table 1: List of genes modulated by LANA expression**

See Supplementary File 1
